# Supplementary material for: Doping and interface engineering in a sandwich Ti3C2Tx/MoS2−xPx heterostructure for efficient hydrogen evolution
Source: Royal Society of Chemistry journal article supplement (doi:10.1039/d1tc05974b), 2022-01-01
Supplement: d1tc05974b1.pdf [file d1tc05974b1.pdf]

## Supporting Information

### Doping and Interface Engineering in Sandwich $\text{Ti}_3\text{C}_2\text{T}_x/\text{MoS}_{2-x}\text{P}_x$ Heterostructure for Efficient Hydrogen Evolution

Xiaojun Zeng,<sup>a,\*</sup><sup>1</sup> Derong Duan,<sup>a,1</sup> Xiaofeng Zhang,<sup>b,\*</sup> Xiaohong Li,<sup>a</sup> Kai Li,<sup>a</sup> Ronghai Yu,<sup>c</sup> Martin  
Moskovits<sup>d</sup>

<sup>a</sup> School of Materials Science and Engineering, Jingdezhen Ceramic University, Jingdezhen 333403,  
China

<sup>b</sup> Guangdong Academy of Science, Guangdong Institute of New Materials, National Engineering  
Laboratory for Modern Materials Surface Engineering Technology, The Key Lab of Guangdong for  
Modern Surface Engineering Technology, Guangzhou, 510650, China

<sup>c</sup> School of Materials Science and Engineering, Beihang University, Beijing, 100191, China

<sup>d</sup> Department of Chemistry and Biochemistry, University of California Santa Barbara, Santa  
Barbara, CA, 93106, United States

\* Corresponding author, E-mail: zengxiaojun@jci.edu.cn (X.J. Zeng), zxf200808@126.com (X.F.  
Zhang)

<sup>1</sup> These authors contributed equally to this work.

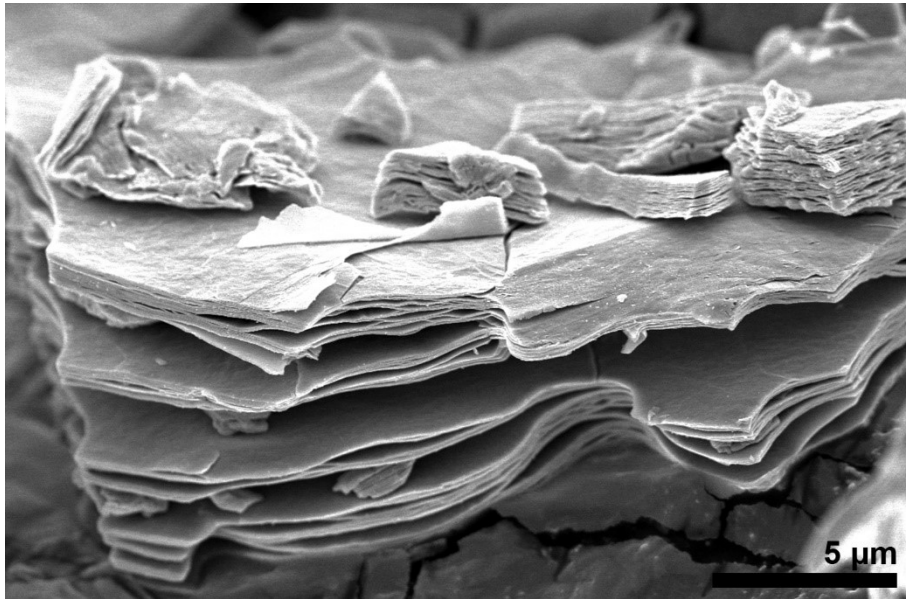

**Figure S1.** SEM images of 2D layered Ti<sub>3</sub>C<sub>2</sub>T<sub>x</sub> MXene.

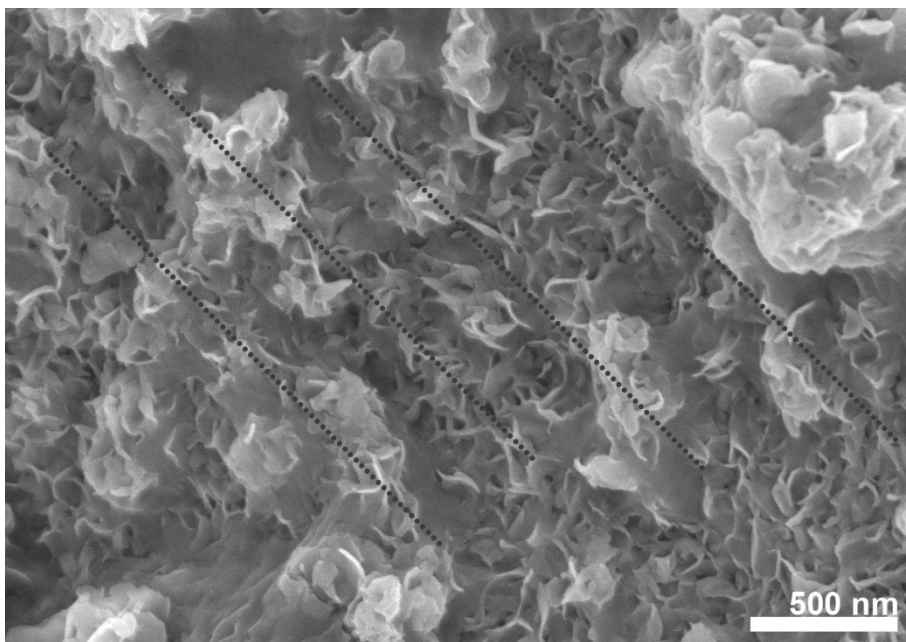

**Figure S2.** SEM images of MXene/MoS<sub>2-x</sub>P<sub>x</sub> heterostructure.

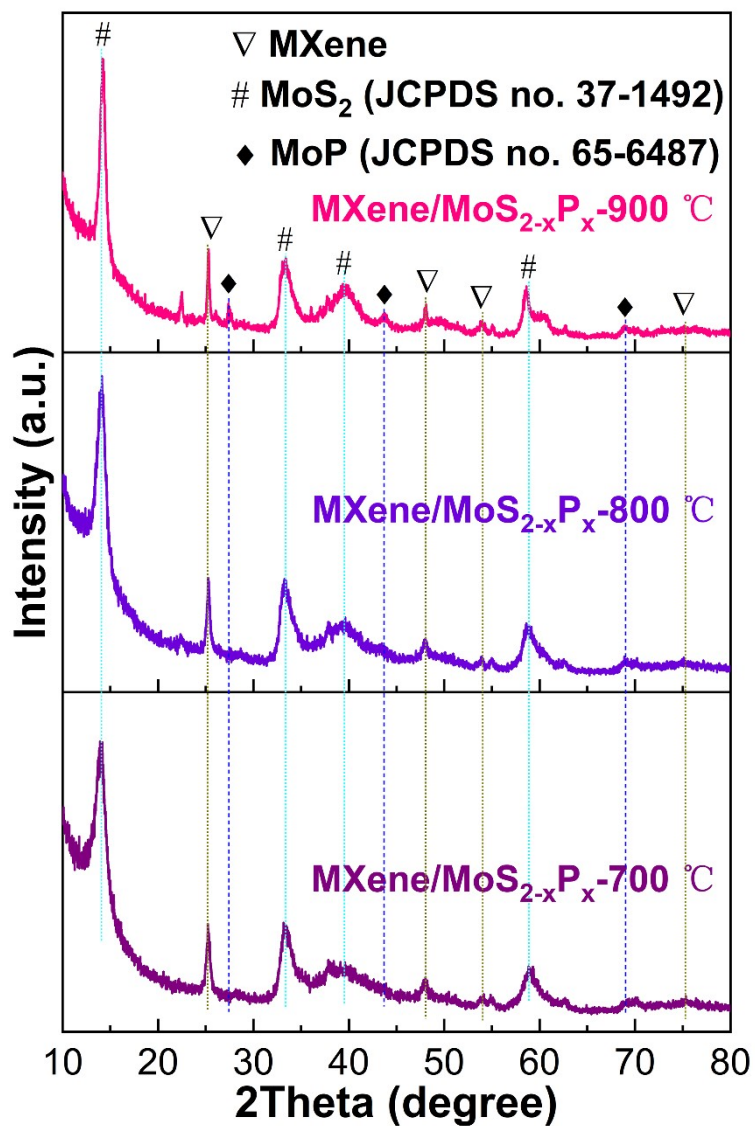

**Figure S3.** XRD patterns of MXene/MoS<sub>2-x</sub>P<sub>x</sub> heterostructure phosphorized at 700, 800, and 900 Celsius.

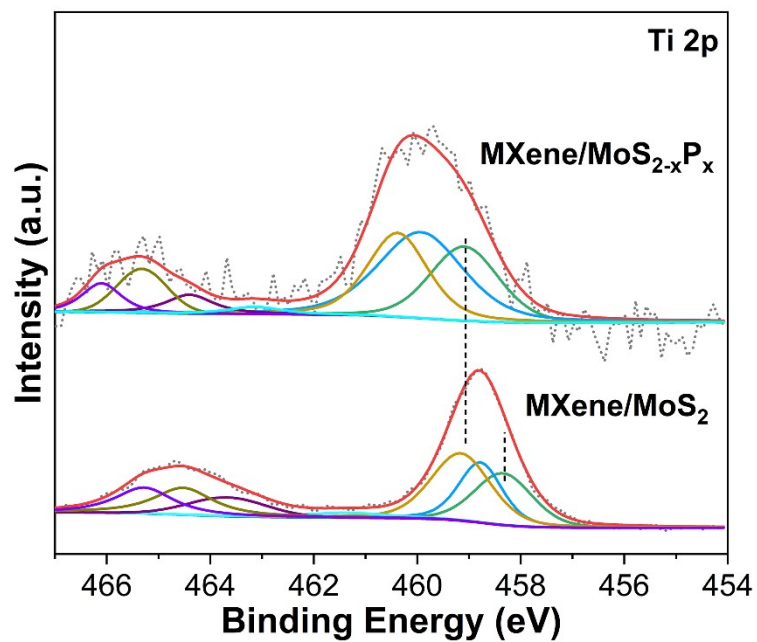

**Figure S4.** Ti 2p XPS spectra of MXene/MoS<sub>2</sub> and MXene/MoS<sub>2-x</sub>P<sub>x</sub> heterostructures.

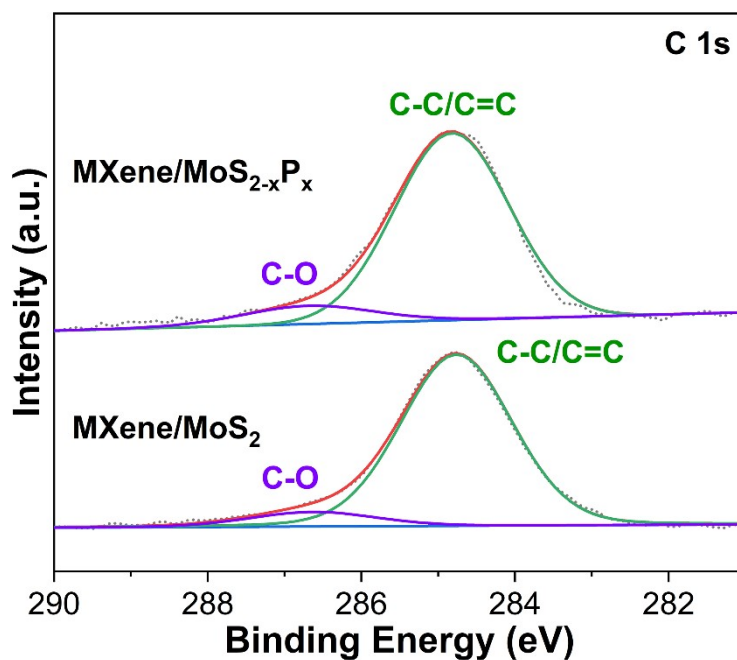

**Figure S5.** C 1s XPS spectra of MXene/MoS<sub>2</sub> and MXene/MoS<sub>2-x</sub>P<sub>x</sub> heterostructures.

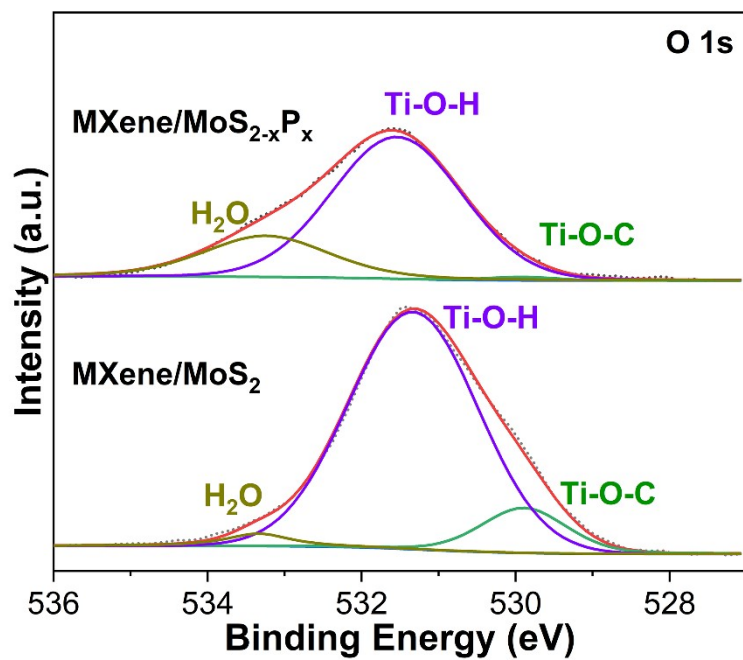

**Figure S6.** O 1s XPS spectra of MXene/MoS<sub>2</sub> and MXene/MoS<sub>2-x</sub>P<sub>x</sub> heterostructures.

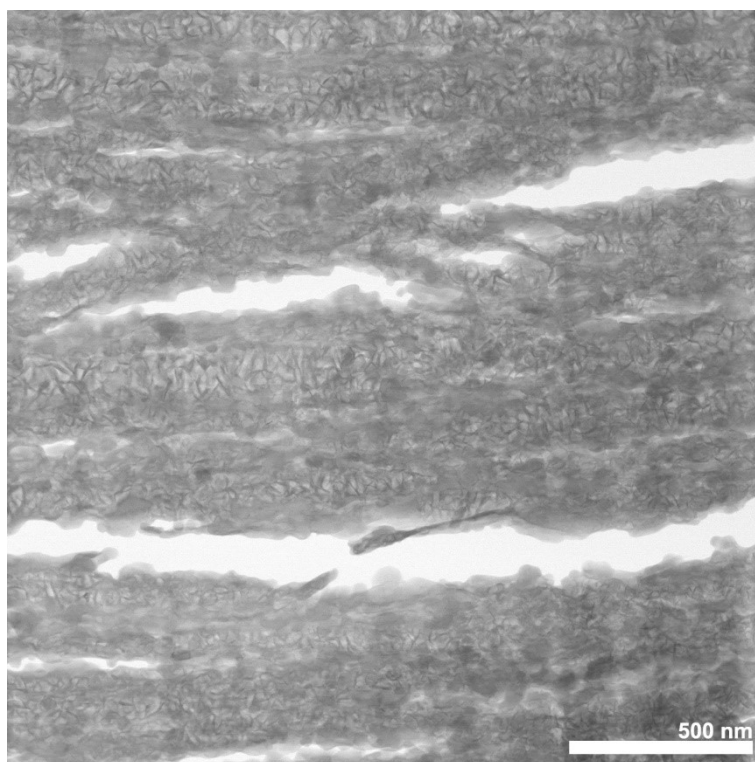

**Figure S7.** STEM image of MXene/MoS<sub>2</sub> heterostructure.



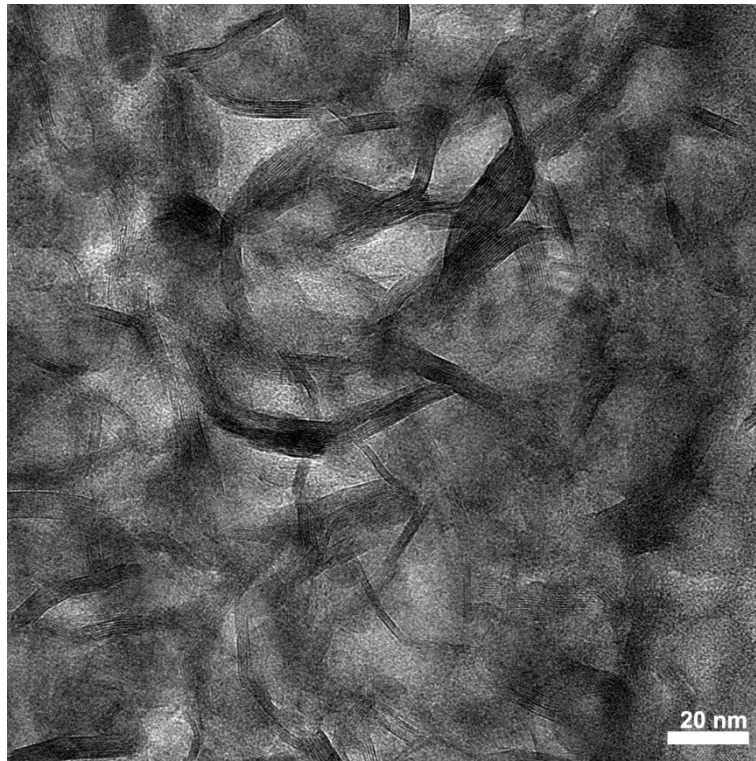

**Figure S8.** TEM image of MXene/MoS<sub>2</sub> heterostructure.

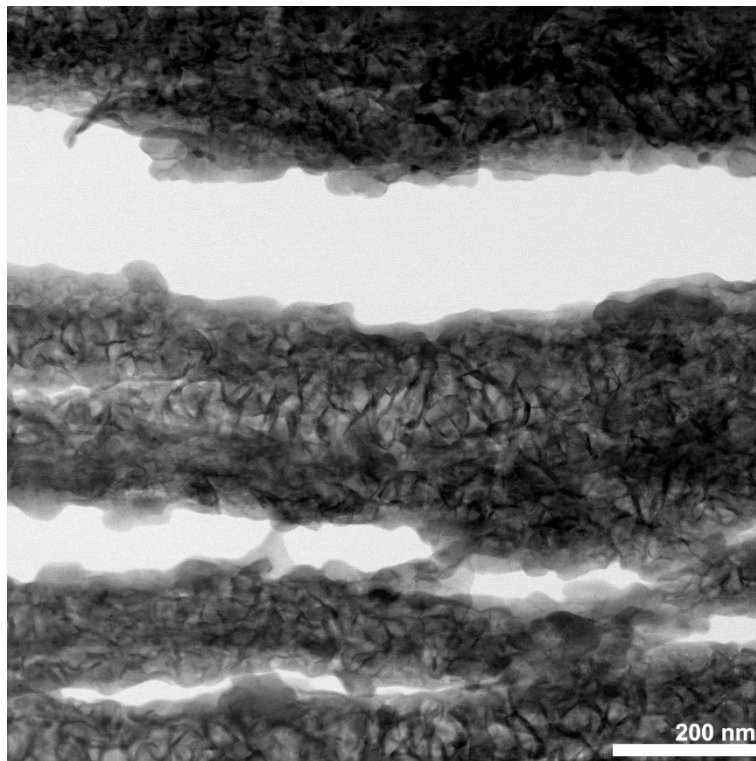

**Figure S9.** STEM image of MXene/MoS<sub>2</sub> heterostructure.

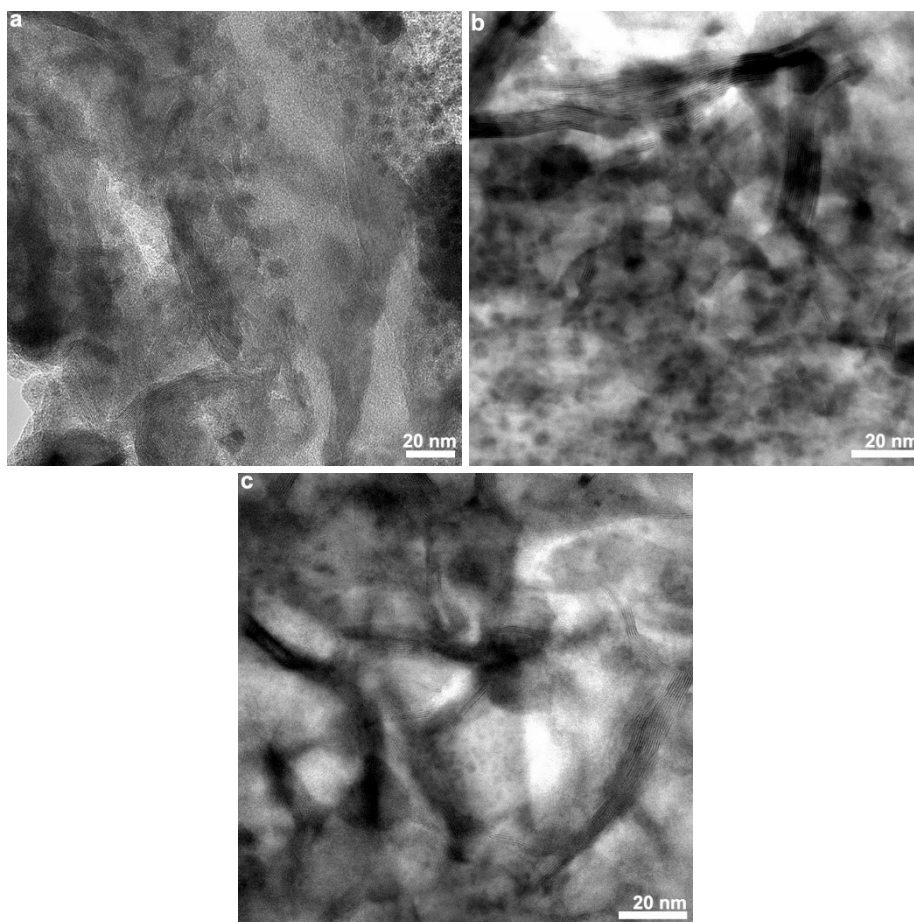

**Figure S10.** STEM image of MXene/MoS<sub>2</sub> heterostructure.

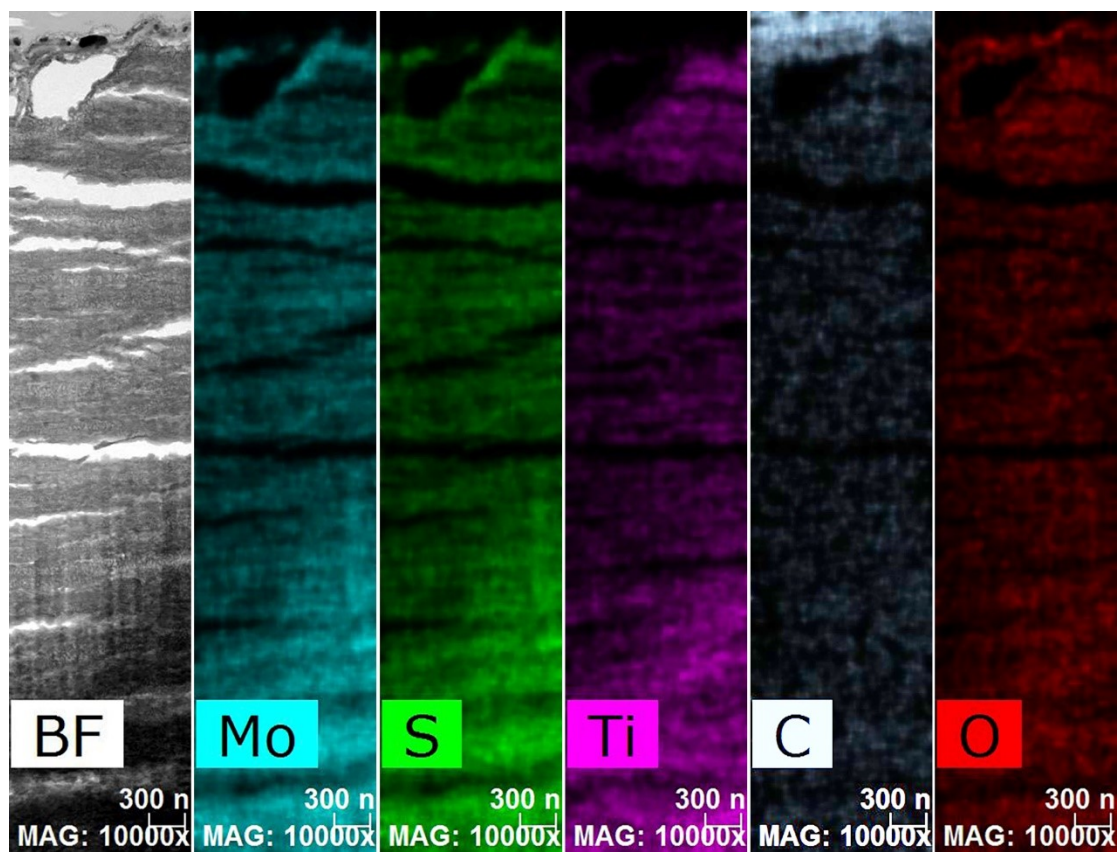

**Figure S11.** Elemental mapping images of MXene/MoS<sub>2</sub> heterostructure.



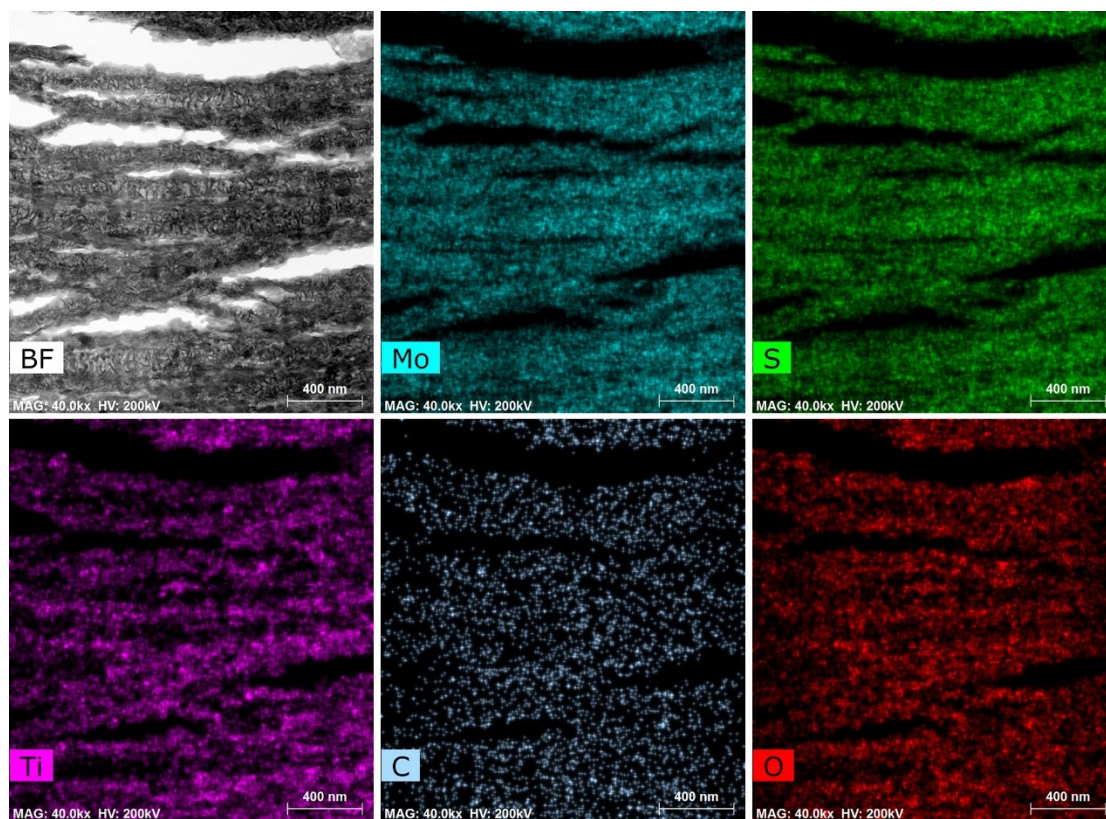

**Figure S12.** Elemental mapping images of MXene/MoS<sub>2</sub> heterostructure.

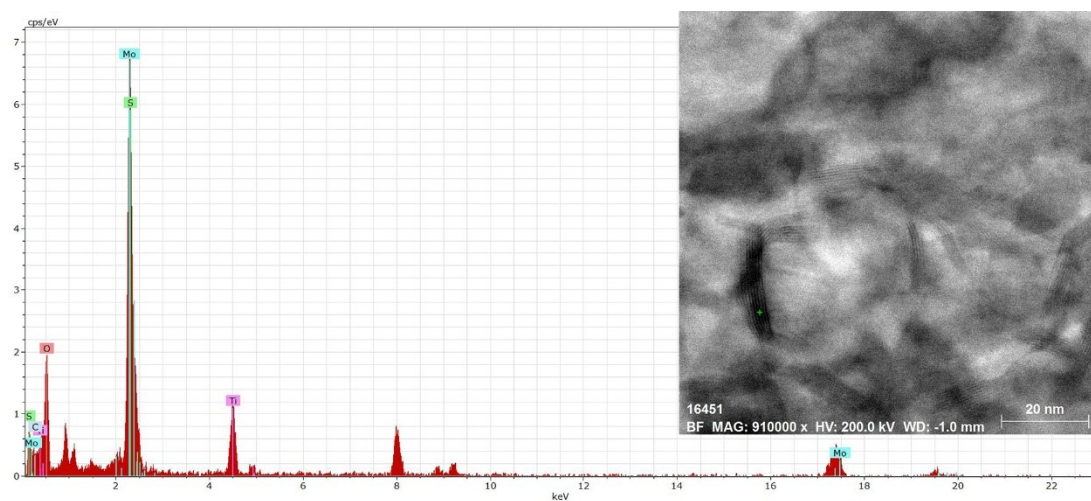

**Figure S13.** EDS spectroscopy of MXene/MoS<sub>2</sub> heterostructure.

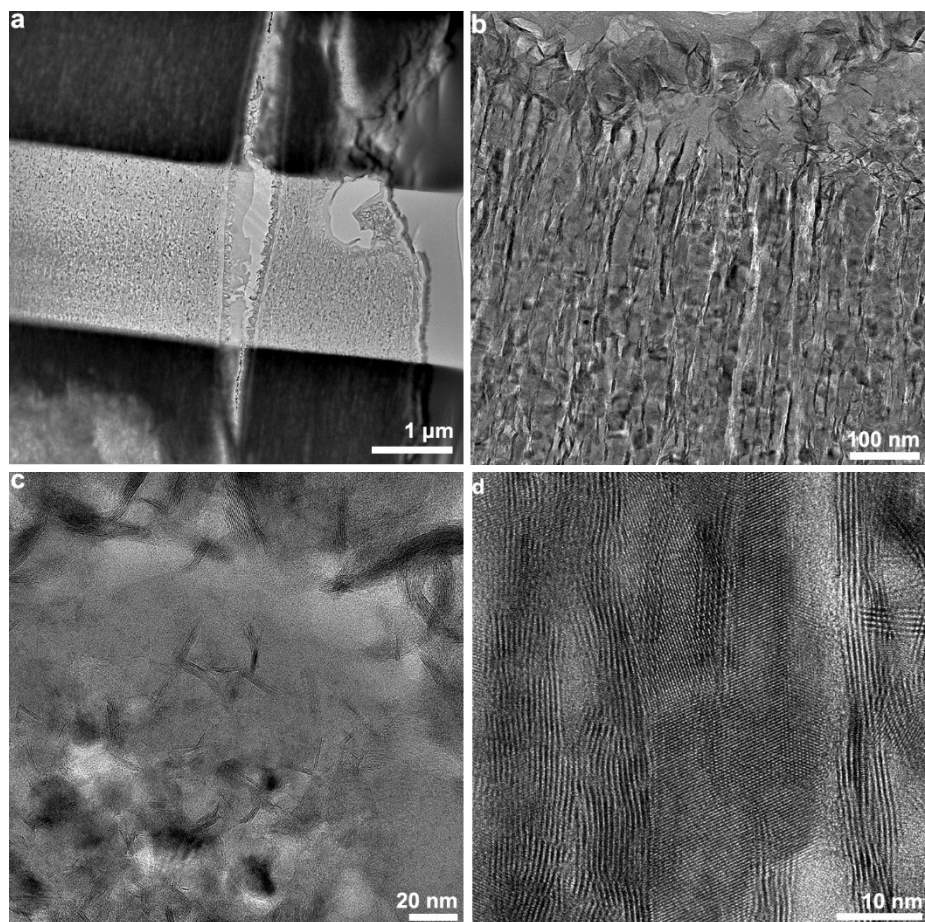

**Figure S14.** (a-c) STEM and (d) HRTEM image of MXene/MoS<sub>2-x</sub>P<sub>x</sub> heterostructure.

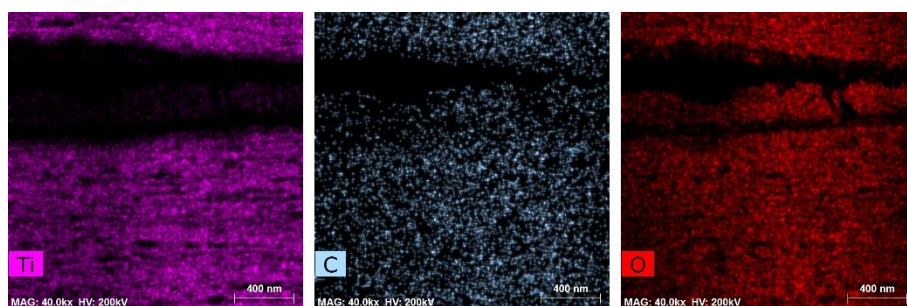

**Figure S15.** Elemental mapping images of Ti, C, and O for MXene/MoS<sub>2-x</sub>P<sub>x</sub> heterostructure.



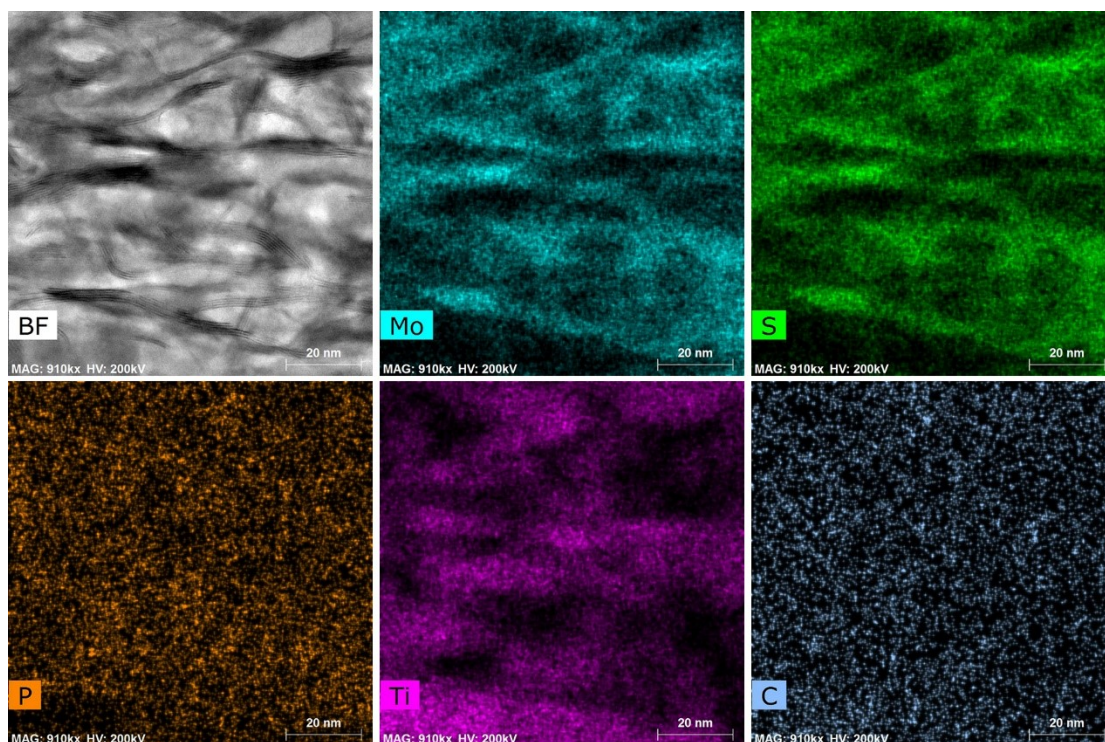

**Figure S16.** Elemental mapping images of MXene/MoS<sub>2-x</sub>P<sub>x</sub> heterostructure.

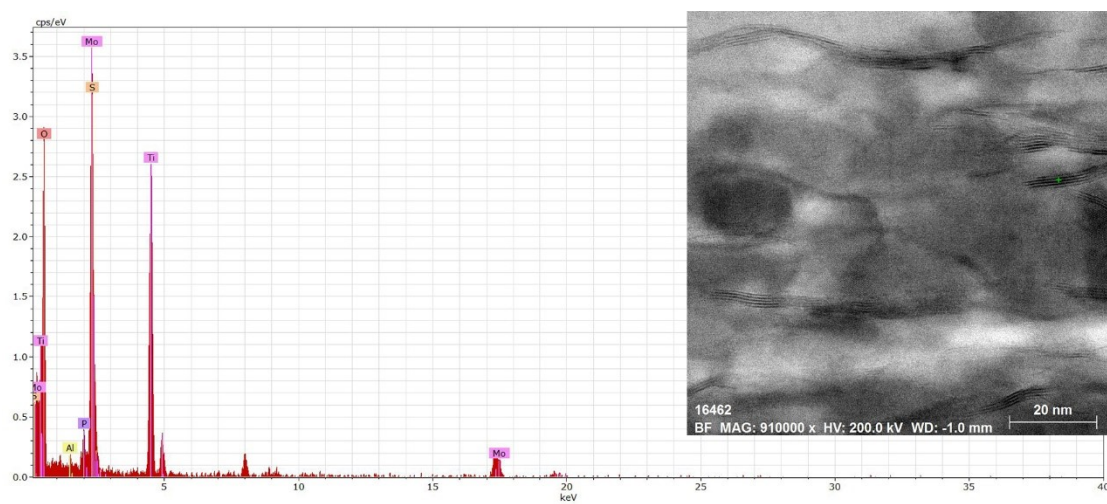

**Figure S17.** EDS spectrum of MXene/MoS<sub>2-x</sub>P<sub>x</sub> heterostructure.

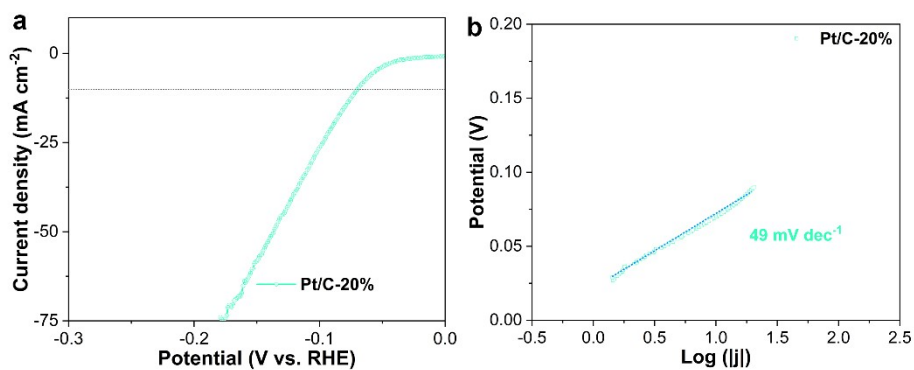

**Figure S18.** (a) HER polarization curves and (b) corresponding Tafel slope of Pt/C-20%.

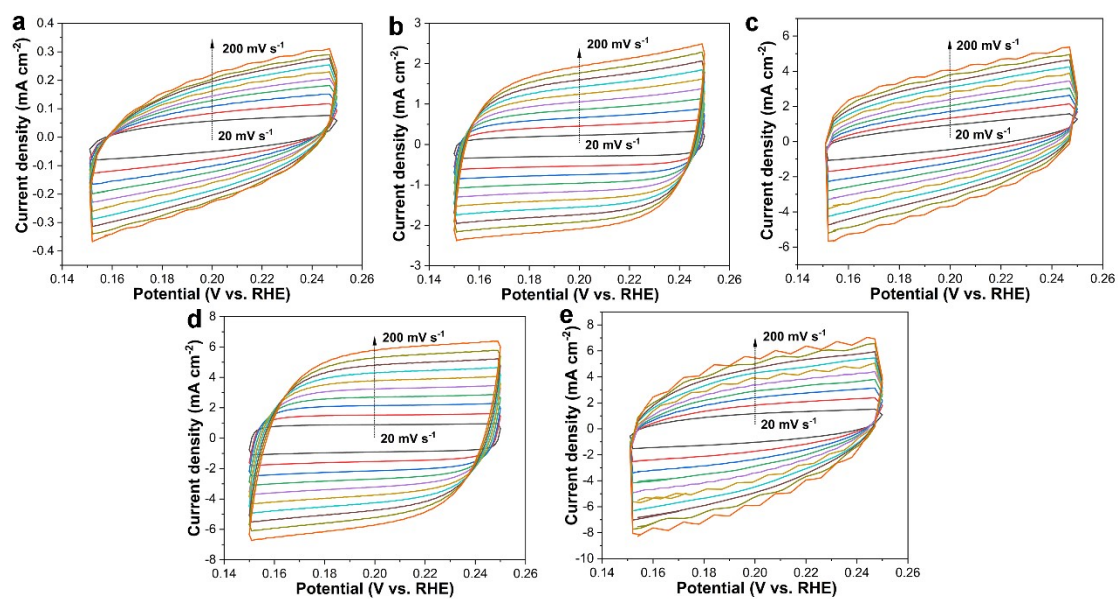

**Figure S19.** CV curve in a non-Faradaic potential region (0.15~0.25 V vs RHE) under different scan rates of (a) MXene, (b) MXene/MoS<sub>2</sub>, and MXene/MoS<sub>2-x</sub>P<sub>x</sub> heterostructure phosphated at (c) 700 °C, (d) 800 °C, and (e) 900 °C.

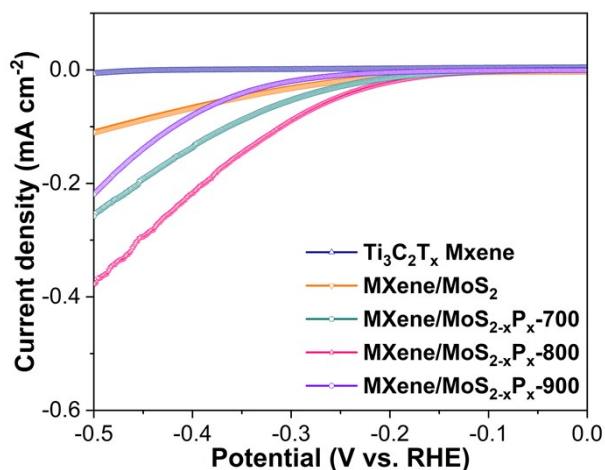

**Figure S20.** ECSA-normalized LSV curves of MXene, MXene/MoS<sub>2</sub>, and MXene/MoS<sub>2-x</sub>P<sub>x</sub> heterostructure phosphated at 700 °C, 800 °C, and 900 °C. The  $C_{dl}$  can be converted into ECSA using the specific capacitance value for a flat surface of 0.035 mF cm<sup>-2</sup> according to  $ECSA = C_{dl} / 0.035 \text{ mF cm}^{-2}$ .

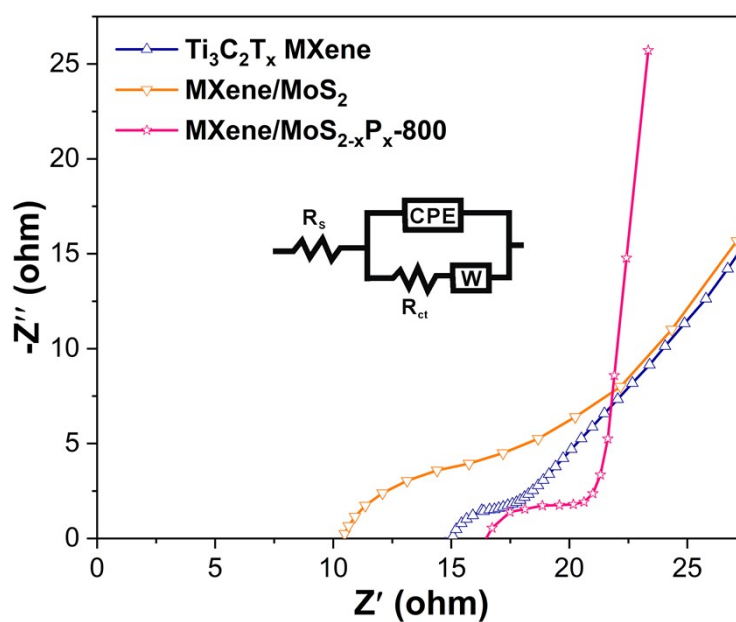

**Figure S21.** Nyquist EIS spectra of MXene, MXene/MoS<sub>2</sub>, and MXene/MoS<sub>2-x</sub>P<sub>x</sub> heterostructure.



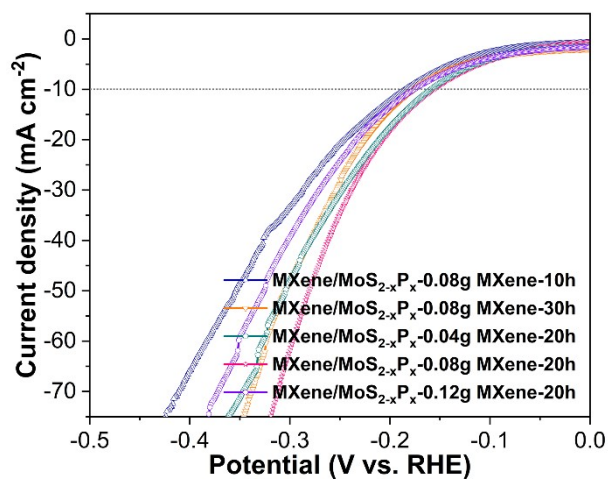

**Figure S22.** HER polarization curve of as-synthesized MXene/MoS<sub>2-x</sub>P<sub>x</sub> heterostructure with different hydrothermal reaction time (10 h, 20 h, and 30 h) and MXene mass (0.04 g, 0.08 g, and 0.12 g).

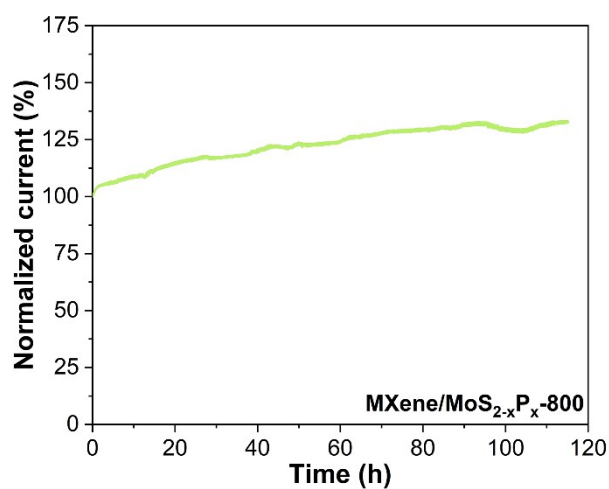

**Figure S23.** Long-term stability of MXene/MoS<sub>2-x</sub>P<sub>x</sub> at -0.281 V (vs. RHE, applied potential at 50 mA cm<sup>-2</sup>) for 115 h.

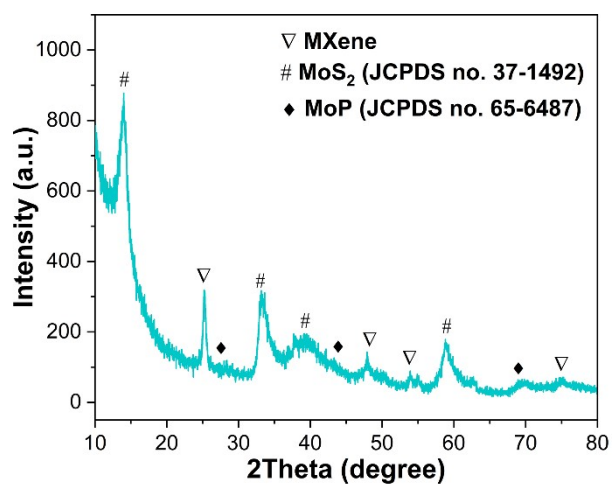

**Figure S24.** XRD pattern of MXene/MoS<sub>2-x</sub>P<sub>x</sub> heterostructure after the long-term stability test (12 h).

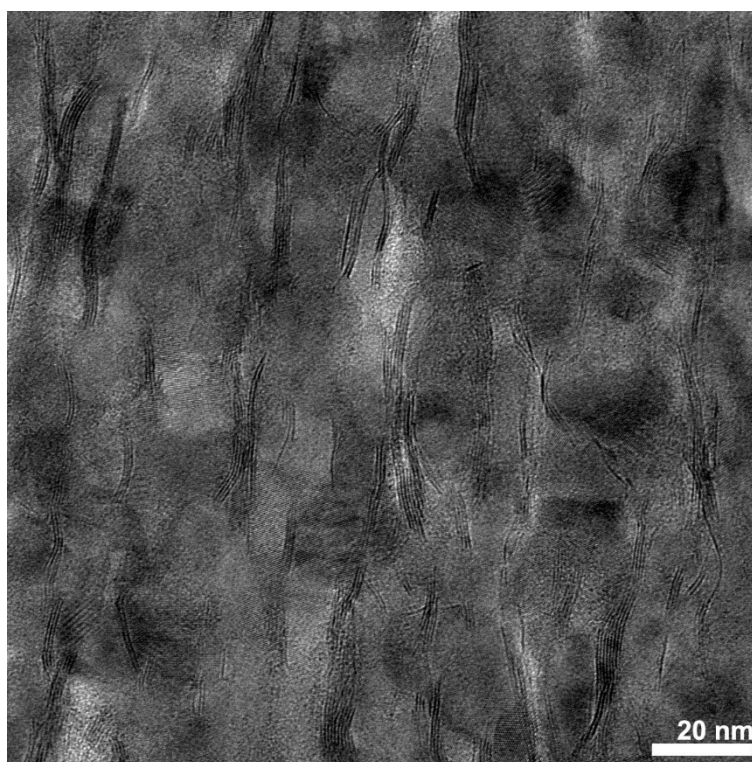

**Figure S25.** HRTEM images of MXene/MoS<sub>2-x</sub>P<sub>x</sub> heterostructure after the long-term stability test (12 h).

**Table S1.** Element contents in the MXene/MoS<sub>2</sub> and MXene/MoS<sub>2-x</sub>P<sub>x</sub> heterostructures detected by XPS technique.

| Elements | Atomic %               |                                         |
|----------|------------------------|-----------------------------------------|
|          | MXene/MoS <sub>2</sub> | MXene/MoS <sub>2-x</sub> P <sub>x</sub> |
| C        | 31.85                  | 25.12                                   |
| S        | 16.46                  | 31.14                                   |
| Mo       | 13.03                  | 18.88                                   |
| Ti       | 2.79                   | 1.26                                    |
| O        | 35.87                  | 19.24                                   |
| P        | -                      | 4.37                                    |

**Table S2.** Electrocatalytic performances toward HER of MXene/MoS<sub>2-x</sub>P<sub>x</sub> and recently advanced non-noble-based catalysts.

| Electrocatalysts                       | Loading (mg cm <sup>-2</sup> ) | HER $\eta$ (mV) @10 mA cm <sup>-2</sup> | Electrolyte                          | Ref. |
|----------------------------------------|--------------------------------|-----------------------------------------|--------------------------------------|------|
| WS <sub>2</sub>                        | 0.283                          | 337.0                                   | 0.5 M H <sub>2</sub> SO <sub>4</sub> | 1    |
| RuTe <sub>2</sub> alloy                | 0.203                          | 245.0                                   | 0.5 M H <sub>2</sub> SO <sub>4</sub> | 2    |
| C <sub>3</sub> N <sub>4</sub> @NG      | -                              | 240.0                                   | 0.5 M H <sub>2</sub> SO <sub>4</sub> | 3    |
| MoS <sub>2</sub>                       | -                              | 240.0                                   | 0.5 M H <sub>2</sub> SO <sub>4</sub> | 4    |
| CoS <sub>1.097</sub> /MoS <sub>2</sub> | 0.170                          | 228.0                                   | 0.5 M H <sub>2</sub> SO <sub>4</sub> | 5    |
| Ni-P                                   | -                              | 222.0                                   | 0.5 M H <sub>2</sub> SO <sub>4</sub> | 6    |
| MoS <sub>2</sub> -2C                   | 0.500                          | 217.0                                   | 0.5 M H <sub>2</sub> SO <sub>4</sub> | 7    |
| Co/MoS <sub>2-x</sub>                  | -                              | 210.0                                   | 0.5 M H <sub>2</sub> SO <sub>4</sub> | 8    |
| Fe,Al-NiSe <sub>2</sub> /rGO           | -                              | 197.0                                   | 0.5 M H <sub>2</sub> SO <sub>4</sub> | 9    |
| Ag@MoS <sub>2</sub>                    | 0.010                          | 195.7                                   | 0.5 M H <sub>2</sub> SO <sub>4</sub> | 10   |
| P-MoS <sub>2</sub>                     | 0.200                          | 194.0                                   | 0.5 M H <sub>2</sub> SO <sub>4</sub> | 11   |
| Co <sub>9</sub> S <sub>8</sub>         | -                              | 193.0                                   | 0.5 M H <sub>2</sub> SO <sub>4</sub> | 12   |

|                                                    |       |       |                                      |           |
|----------------------------------------------------|-------|-------|--------------------------------------|-----------|
| Cr <sub>0.4</sub> Mo <sub>0.6</sub> B <sub>2</sub> | -     | 192.0 | 0.5 M H <sub>2</sub> SO <sub>4</sub> | 13        |
| CoSAs-MoS <sub>2</sub> /TiN                        | -     | 187.5 | 0.5 M H <sub>2</sub> SO <sub>4</sub> | 14        |
| Ni <sub>2</sub> P@C                                | 0.540 | 186.0 | 0.5 M H <sub>2</sub> SO <sub>4</sub> | 15        |
| MoSe <sub>2</sub> -ts@MoS <sub>2</sub> -ts-c       |       | 186.0 | 0.5 M H <sub>2</sub> SO <sub>4</sub> | 16        |
| Co@NG                                              | -     | 182.0 | 0.5 M H <sub>2</sub> SO <sub>4</sub> | 17        |
| Mo <sub>2</sub> C@PC                               | 0.410 | 177.0 | 0.5 M H <sub>2</sub> SO <sub>4</sub> | 18        |
| SV-MoS <sub>2</sub>                                | -     | 170.0 | 0.5 M H <sub>2</sub> SO <sub>4</sub> | 19        |
| 2H-MoSe <sub>2</sub>                               | -     | 170.0 | 0.5 M H <sub>2</sub> SO <sub>4</sub> | 20        |
| P-MoO <sub>3-x</sub>                               | 0.285 | 166.0 | 0.5 M H <sub>2</sub> SO <sub>4</sub> | 21        |
| NC@MoSe <sub>2</sub>                               | -     | 164.0 | 0.5 M H <sub>2</sub> SO <sub>4</sub> | 22        |
| WS <sub>2</sub>                                    | 0.390 | 162.0 | 0.5 M H <sub>2</sub> SO <sub>4</sub> | 23        |
| Mo <sub>2</sub> C@ng/CNT                           | -     | 160.0 | 0.5 M H <sub>2</sub> SO <sub>4</sub> | 24        |
| MoP                                                | 0.860 | 158.0 | 0.5 M H <sub>2</sub> SO <sub>4</sub> | 25        |
| MXene/MoS <sub>2-x</sub> P <sub>x</sub>            | 0.200 | 157.0 | 0.5 M H <sub>2</sub> SO <sub>4</sub> | This work |
| rGO/SiO <sub>2</sub>                               | -     | 134.0 | 0.5 M H <sub>2</sub> SO <sub>4</sub> | 26        |
| PSS-MoS <sub>2</sub> /CNT                          | -     | 114.0 | 0.5 M H <sub>2</sub> SO <sub>4</sub> | 27        |
| Pd-TiO <sub>2</sub>                                | 0.500 | 108.0 | 0.5 M H <sub>2</sub> SO <sub>4</sub> | 28        |
| Pt <sub>1</sub> @Fe-N-C                            | 0.400 | 60.0  | 0.5 M H <sub>2</sub> SO <sub>4</sub> | 29        |
| RhP <sub>x</sub> @NPC                              | 0.125 | 22.0  | 0.5 M H <sub>2</sub> SO <sub>4</sub> | 30        |

## References

- 1 W. L. Liu, J. Benson, C. Dawson, A. Strudwick, A. P. A. Raju, Y. S. Han, M. X. Li and P. Papakonstantinou, *Nanoscale*, 2017, **9**, 13515-13526.
- 2 J. Wang, L. L. Han, B. L. Huang, Q. Shao, H. L. Xin and X. Q. Huang, *Nat. Commun.*, 2019, **10**, 5692.
- 3 Y. Zheng, Y. Jiao, Y. Zhu, L. H. Li, Y. Han, Y. Chen, A. Du, M. Jaroniec and S. Z.

- Qiao, *Nat. Commun.*, 2014, **5**, 3783.
- 4 X. Y. Qian, K. Xie, S. Y. Guo, Q. H. Liang, S. L. Zhang, Z. Y. Xiong, H. L. Zhan, C. C. Liu, X. W. Yang, J. W. Zhu and D. Li, *Chem. Commun.*, 2020, **56**, 7005-7008.
- 5 J. P. Sun, Z. D. Huang, T. X. Huang, X. K. Wang, X. Wang, P. Y. Yu, C. Zong, F. N. Dai and D. F. Sun, *ACS Appl. Energy Mater.*, 2019, **2**, 7504-7511.
- 6 R. N. Wasalathanthri, S. Jeffrey, N. Su, K. Sun and D. M. Giolando, *ChemistrySelect*, 2017, **2**, 8020-8027.
- 7 J. Xu, X. J. Cui, Z. W. Fan, X. X. Zhu, W. Guo, Z. Z. Xie, D. Liu, D. Y. Qu, H. L. Tang and J. S. Li, *Mater. Adv.*, 2021, DOI: 10.1039/D1MA00681A.
- 8 S. Park, J. Park, H. Abroshan, J. M. Zhang, J. H. Guo, S. Siahrostami and X. L. Zheng, *ACS Energy Lett.*, 2018, **3**, 2685-2693.
- 9 L. L. Chen, H. Jang, M. G. Kim, Q. Qin, X. E. Liu and J. Cho, *Nanoscale*, 2020, **12**, 13680-13687.
- 10 J. Z. Chen, G. G. Liu, Y.-Z. Zhu, M. Su, P. F. Yin, X.-J. Wu, Q. P. Lu, C. L. Tan, M. T. Zhao, Z. Q. Liu, W. M. Yang, H. Li, G.-H. Nam, L. P. Zhang, Z. H. Chen, X. Huang, P. M. Radjenovic, W. Huang, Z.-Q. Tian, J.-F. Li and H. Zhang, *J. Am. Chem. Soc.*, 2020, **142**, 7161-7167.
- 11 W. Z. Wu, C. Y. Niu, C. Wei, Y. Jia, C. Li and Q. Xu, *Angew. Chem. Int. Ed.*, 2019, **58**, 2029-2033.
- 12 H. Y. Mou, Z. M. Xue, B. L. Zhang, X. Lan and T. C. Mu, *J. Mater. Chem. A*, 2021, **9**, 2099-2103.
- 13 H. Park, E. Lee, M. Lei, H. Joo, S. Coh and B. P. T. Fokwa, *Adv. Mater.*, 2020, **32**,



- 202000855.
- 14 T. L. L. Doan, D. C. Nguyen, S. Prabhakaran, D. H. Kim, D. T. Tran, N. H. Kim and J. H. Lee, *Adv. Funct. Mater.*, 2021, **31**, 2100233.
- 15 S. Q. He, S. Y. He, F. Gao, X. Bo, Q. X. Wang, X. J. Chen, J. J. Duan and C. Zhao, *Appl. Surf. Sci.*, 2018, **457**, 933-941.
- 16 M. D. Sharma, C. Mahala and M. Basu, *Inorg. Chem.*, 2020, **59**, 4377-4388.
- 17 X. D. Wen, L. Bai, M. Li and J. Q. Guan, *ACS Sustainable Chem. Eng.*, 2019, **7**, 9249-9256.
- 18 J. Yang, F. J. Zhang, X. Wang, D. S. He, G. Wu, Q. H. Yang, X. Hong, Y. E. Wu and Y. D. Li, *Angew. Chem.*, 2016, **128**, 13046-13050.
- 19 H. Li, C. Tsai, A. L. Koh, L. L. Cai, A. W. Contryman, A. H. Fragapane, J. H. Zhao, H. S. Han, H. C. Manoharan, F. Abild-Pedersen, J. K. Nørskov and X. L. Zheng, *Nat. Mater.*, 2016, **15**, 48-53.
- 20 Y. S. Chang, C. Y. Chen, C. J. Ho, C. M. Cheng, H. R. Chen, T. Y. Fu, Y. T. Huang, S. W. Ke, H. Y. Du, K. Y. Lee, L. C. Chao, L. C. Chen, K. H. Chen, Y. W. Chu and R. S. Chen, *Nano Energy*, 2021, **84**, 105922.
- 21 L. Li, T. Zhang, J. Q. Yan, X. D. Cai and S. Z. (Frank) Liu, *Small*, 2017, **13**, 1700441.
- 22 W. H. Chen, R. Qiao, C. S. Song, L. H. Zhao, Z.-J. Jiang, T. Maiyalagan and Z. Q. Jiang, *J. Catal.*, 2020, **381**, 363-373.
- 23 I. H. Kwak, I. S. Kwon, J. H. Lee, Y. R. Lim and J. Park, *J. Mater. Chem. C*, 2021, **9**, 101-109.

- 24 C. F. Yang, K. Shen, R. Zhao, H. Xiang, J. Wu, W. D. Zhong, Q. Zhang, X. K. Li and N. J. Yang, *Adv. Funct. Mater.*, 2021, 2108167.
- 25 P. Xiao, M. A. Sk, L. Thia, X. M. Ge, R. J. Lim, J.-Y. Wang, K. H. Lim and X. Wang, *Energy Environ. Sci.*, 2014, **7**, 2624-2629.
- 26 Y. J. Huang, M. Wang, Y. Li, S. J. Yin, H. W. Zhu and C. L. Wan, *Small Methods*, 2021, **5**, 2100621.
- 27 P. F. Wang, Y. X. Dai, X. Y. Wang, X. Ren and C. N. Luo, *ChemElectroChem*, 2021, **8**, 2259-2265.
- 28 X. J. Zeng, Y. C. Bai, S. M. Choi, L. J. Tong, R. M. Aleisa, Z. W. Li, X. F. Liu, R. H. Yu, N. V. Myung and Y. D. Yin, *Mater. Today Nano*, 2019, **6**, 100038.
- 29 X. J. Zeng, J. L. Shui, X. F. Liu, Q. T. Liu, Y. C. Li, J. X. Shang, L. R. Zheng and R. H. Yu, *Adv. Energy Mater.*, 2018, **8**, 1701345.
- 30 J. Q. Chi, X. J. Zeng, X. Shang, B. Dong, Y. M. Chai, C. G. Liu, M. Marin and Y. D. Yin, *Adv. Funct. Mater.*, 2019, **29**, 1901790.
